# Supplementary material for: LncRNA-RP11 Modulates TGF-β1-Activated Radiation-Induced Lung Injury Through Downregulating microRNA-29a
Source: PubMed Central journal article supplement — Dose Response. 2020 Oct 16;18(4):1559325820949071. doi: 10.1177/1559325820949071 (PMC7573740; doi:10.1177/1559325820949071), 2020-10-16
Supplement: supplementary_Table_1.pdf [file supplementary_Table_1.pdf]

**Supplementary Table 1.** Primers used in this study

| Name                            | Primer Sequence             |
|---------------------------------|-----------------------------|
| <b>LncRNA-RP11</b>              |                             |
| Forward                         | 5'-TGTCCTCTGTGTGCAGCTCT-3'  |
| Reverse                         | 5'-CAACAAGGGAGCGCTTTATC-3'  |
| <b><math>\beta</math>-actin</b> |                             |
| Forward                         | 5'-TGCGCTAGCACCATCTGAAAT-3' |
| Reverse                         | 5'-CAGTGCAGGGTCCGAGGT-3'    |
